# Supplementary material
Source: HighWire-hosted journal article supplement (https://www.qdcxjkg.com/highwire/filestream/113561/field_highwire_adjunct_files/13/41_Stolzenburg1935.pdf)
Supplement: 41_Stolzenburg1935.pdf [file 41_Stolzenburg1935.pdf]

Reference no. 41 of

Winkelmann A, Noack T: The Clara cell – a 'Third Reich eponym'? *Eur Respir J* 2010; 36: 722–727

Stolzenburg: Minute in the records of the Ministry of Justice, dated 23 March 1936. *Archive*: Bundesarchiv, Berlin. *Signature*: BArch, R3001/21478, p3021.

**Short comment by the authors:**

These minutes from the records of the Ministry of Justice in Berlin pertain to a meeting between the Chief Prosecutor of Dresden, Viermetz, and an employee of the Ministry of Justice, Stolzenburg. The last paragraph deals with anatomical dissection. The Ministry allows dissection even if the relatives claim the body, but forbids removal of "body parts" (*Leichenteile*).

It may appear from these minutes that these men did not understand that Max Clara had to remove parts of the dissected body for his histological research. Other minutes from the same source suggest that Stolzenburg failed to obtain a decision by the Minister and therefore suggests this 'compromise'.

- 1) In Vertretung von H.GStA. Dr. Jung erschien heute H.OStA. Viermets - Dresden bei mir. Ich habe ihm folgendes mitgeteilt:

Geht kurz vor der Hinrichtung ein ~~W.~~A. Antrag des Verurteilten ein, so hat der OStA. nach pflichtmäßigen Ermessen zu prüfen, ob der Inhalt des Antrags zu einem Aufschub der Vollstreckung Anlaß gibt. Erscheint der Antrag aussichtslos, so ist die Vollstreckung ohne Rücksicht auf ihn durchzuführen. Andernfalls haben sich die zur Entscheidung über den Antrag berufenen Richter sofort im Kraftwagen zum Hinrichtungsort zu begeben und dort über den Antrag zu entscheiden. Läßt sich die Entscheidung nicht mehr rechtzeitig herbeiführen, so wird die Hinrichtung um einen Tag zu verschieben sein.

Dem Arzten kann gestattet werden, auch eine Leiche, die die Angehörigen herausverlangt haben, zu sezieren; Leichenteile dürfen jedoch nicht entnommen werden.

ges. Stolzenburg, 23.3.1936

- 2) Z.d.Akten.
